## 1 **Single molecule targeted sequencing for cancer gene mutation detection**

2 Yan Gao<sup>1</sup>, Liwei Deng<sup>1</sup>, Qin Yan<sup>1</sup>, Yongqian Gao<sup>2</sup>, Zengding Wu<sup>1</sup>, Jinsen Cai<sup>1</sup>, Daorui Ji<sup>1</sup>,  
3 Gailing Li<sup>1</sup>, Ping Wu<sup>1</sup>, Huan Jin<sup>1</sup>, Luyang Zhao<sup>3</sup>, Song Liu<sup>4</sup>, Michael W. Deem<sup>5</sup>, Jiankui He<sup>6,1,\*</sup>

4 <sup>1</sup>Direct Genomics Co., Ltd. Shenzhen, Guangdong, China

5 <sup>2</sup>Institute of Advanced Materials, Nanjing Tech University, Nanjing, Jiangsu, China

6 <sup>3</sup>Chemistry Department, North Carolina State University, Raleigh, NC, USA

7 <sup>4</sup>Clinical Medical Research Center, the Second Clinical Medical College of Jinan University  
8 (Shenzhen People's Hospital), Shenzhen, Guangdong, China

9 <sup>5</sup>Departments of Bioengineering and Physics & Astronomy, Rice University, Houston, TX, USA

10 <sup>6</sup>Department of Biology, South University of Science and Technology of China, Shenzhen,  
11 Guangdong, China

12 \*Corresponding author, Email: [hejk@sustc.edu.cn](mailto:hejk@sustc.edu.cn)

### 13 **Abstract**

14 With the rapid decline cost of sequencing, it is now clinically affordable to examine multiple  
15 genes in a single disease-targeted test using next generation sequencing. Current targeted  
16 sequencing methods require a separate step of targeted capture enrichment during sample  
17 preparation before sequencing, and the library preparation process is labor intensive and time  
18 consuming. Here, we introduced an amplification-free Single Molecule Targeted Sequencing  
19 (SMTS) technology, which combined targeted capture and sequencing in one step. We  
20 demonstrated that this technology can detect low-frequency mutations of cancer genes. SMTS  
21 has several advantages, namely that it requires little sample preparation and avoids biases and  
22 errors introduced by PCR reaction. SMTS can be applied in cancer gene mutation detection,  
23 inherited condition screening and noninvasive prenatal diagnosis.

### 24 **Introduction**

25 In the past few years, the cost of large-scale DNA sequencing has been dramatically driven down  
26 by the tremendous advances in next-generation sequencing (NGS)<sup>1</sup>. Nonetheless, the cost of  
27 human whole genome sequencing and bioinformatics interpretation is still significant. In clinical  
28 practice, NGS is used to examine specific gene panels such as cancer genes and inherited  
29 conditions, sample numbers are high and data volume per sample is relatively small. It is often  
30 more cost-effective and time-efficient to target, capture, and sequence only the genomic regions  
31 of interest<sup>2</sup>. For example, there are several cancer gene panels commercially available, targeting  
32 as few as 50 to many hundreds of genes that are frequently mutated in cancer patients<sup>3</sup>. The  
33 cancer gene panel targeted sequencing has been proved to be useful in hereditary cancers  
34 diagnosis, and disease management.

35 Current NGS based targeted sequencing methods require a separate step of capture enrichment  
36 during sample preparation before sequencing<sup>4, 5</sup>. The two most commonly used custom-capture

37 methods are based on hybridization or on highly multiplexed PCR. In the solution-based  
38 hybridization method, biotinylated DNA or RNA complementary probes are designed bind to  
39 gene targets, which are then purified using streptavidin-labeled magnetic beads. In the  
40 multiplexed PCR method, hundreds or thousands of PCR primer pairs are mixed to amplify the  
41 targeted genes.

42 In this report, we demonstrated a technology and platform to perform Single Molecule Targeted  
43 Sequencing (SMTS), which combined targeted capture and sequencing in one step. We used a  
44 combination of Total Internal Reflection Fluorescence (TIRF) microscope and single molecule  
45 fluorescence dyes to reject unwanted background noise and get single molecule resolution  
46 images<sup>6</sup>. The gene-specific flow cell was constructed with capture primers for gene regions of  
47 interest and the target genes can thus be sequenced without copying the DNA or enrichment  
48 before sequencing. Compared to current targeted sequencing methods with separate capture steps,  
49 SMTS has significant advantages, including little sample preparation and avoidance of biases  
50 and errors introduced by PCR amplification<sup>7</sup>. SMTS can be applied in cancer gene mutation  
51 detection, inherited condition screening, and high-resolution human leukocyte antigen (HLA)  
52 typing.

## 53 **Results**

### 54 *Single molecule detection*

55 The fundamental limitation of detection of single molecule fluorescence signals stems from the  
56 intrinsic qualities of the fluorophore. The key challenge is to reduce the background interference,  
57 which may arise from Rayleigh scattering, Raman scattering, and contaminant fluorescence.  
58 Various single-molecule fluorescence microscopy techniques have been developed in the last  
59 two decades to overcome the difficulty in detecting single molecules with high signal to noise  
60 ratios in the presence of optical background<sup>8</sup>.

61 We applied Total Internal Reflection Fluorescence (TIRF) microscopy in this study. The optical  
62 setup is shown in Fig. 1. When light strikes an interface going from coverslip glass to fluid in the  
63 flow cell chamber at an angle greater than a critical angle, it undergoes a total internal reflection.  
64 This generates an exponentially decaying light field called the "evanescent wave" above the  
65 surface of glass. The evanescent wave excites fluorescent molecules within about 150-200  
66 nanometers of the surface. The fluorescence from the labeled DNA molecules anchored on the  
67 glass surface is detected through a microscope objective and fluorescence filters by high  
68 sensitivity Electron-Multiplying CCD (EMCCD) cameras. As only the vicinity of the surface is  
69 illuminated, the noise from the bulk fluids of flow cell chamber is dramatically reduced. Single  
70 DNA molecules anchored on the surface can thus be monitored with high signal to noise (Fig. S1,  
71 S2 and S3).

72 The choice of fluorescent dyes to label nucleotides is also critical for single molecule detection.  
73 Many common fluorescent labels show rather low photostability if high-intensity laser excitation  
74 is used and processes are to be observed over long periods of time. We choose the ATTO 647N  
75 dyes to label the nucleotides, which fluoresces twice as strong as cyanine 5 in aqueous solution.  
76 Meanwhile, we optimized the imaging buffer to increase the photostability up to five times (Fig.  
77 S5).

78 Single-step photobleaching is used as a quality control to distinguish single molecule from  
79 multiple molecules. In an ideal situation, each DNA molecule is separately binding to the flow  
80 cell surfaces and the minimal distance between two DNA molecules is larger than the diffraction  
81 limit of light. In a random attachment cenari(as used in the present study) drive by Poisson  
82 statistics, two or more DNA molecules may bind to the surface at a distance less than the  
83 Rayleigh criterion. We quantified the amount of single DNA molecules to aggregated DNA  
84 molecules binding to the surface by observing the photobleaching patterns. The single molecules  
85 photobleached in single steps, while aggregated molecules photobleached in multiple steps (Fig.  
86 2). We observed that 38% of spots are real single molecules, where 36% of spots are aggregated  
87 molecules. Only the sequences from the real single molecule spots will be used for analysis.

#### 88 *Targeted hybridization and sequencing*

89 The EGFR, KRAS, BRAF genes were selected for sequencing in this studies. In particular, we  
90 aimed to sequence the 8 genetic variants that are related to drug response, including six point  
91 mutations and two short deletions (Table 1). Eight capture probe sequences were designed in the  
92 upstream of drug response related mutations. The capture probes are synthesized and anchored to  
93 the flow cell surface by a epoxy-NH<sub>2</sub> bond. We synthesized two sets of target DNA templates  
94 for sequencing. The first set was wild type sequence and the second set contained mutations and  
95 short deletions (Table 1). Each target DNA template contained a Cy3 fluorescence dye at the 3'  
96 end. Excitation of 3' Cy3 fluorescent dyes was used to mark positions of annealed templates on  
97 the flow cell surfaces. Synthetic target DNA templates were hybridized to the flow cell with  
98 surface-attached capture probes (Fig 3a).

99 The sequencing reaction began with locating the target DNA templates, which are randomly  
100 hybridized to capture probes (Fig. 3a). The Cy3 fluorescent dyes attached to target DNA  
101 templates are excited by a 532nm green laser and the images were collected to locate the  
102 positions of target DNA templates. Then, disulfide linked Atto647N labeled reversible  
103 terminators and DNA polymerases were added to the flow cell. The reversible terminators were  
104 nucleotide analogs modified to contain a cleavable linker, which allowed only one reversible  
105 terminator to be incorporated into the DNA molecule at one time. The polymerase synthesis  
106 reaction was carried out at temperature 37 °C, with one of four types of reversible terminators and  
107 necessary cofactors. Unincorporated reversible terminators were washed away. The Atto647N  
108 dyes are excited by a 640nm red laser in an optimized imaging buffer mixture with oxygen  
109 scavenging, free radical scavenging, and triplet quenching components. The images were

110 processed using a custom written computer program to automatically locate the spot, determine  
111 image noise, and filter out false-positive spots. After imaging, the Atto647N fluorescence dyes  
112 were cleaved from the reversible terminators, and the system is ready for a second round of  
113 adding reversible terminators and polymerases. The sequencing cycle are repeated many times to  
114 achieve the desired length of read (Fig. 3b).

#### 115 *Sequencing coverage depth*

116 To demonstrate the performance of SMTS, we sequenced the wild-type EGFR/KRAS/BRAF  
117 DNA templates. The synthesized DNA templates were hybridized to the flow cell with surface-  
118 attached capture probes. We sequenced DNA for 19-30 cycles, which enable to cover all  
119 mutation/deletion loci. 300 fields of view were imaged for each cycle. In each field of view,  
120 there are approximate 2200-2500 reads on average. The sequencing reads were aligned to  
121 reference sequences with customized program of Smith-Waterman algorithm (Table 2). We  
122 observed that the coverage depth varies among different DNA templates (Figure 4a). The  
123 possible explanation is that the hybridization efficiency for DNA templates is sequence-  
124 dependent and the secondary structures that involve the target region can also affect  
125 hybridization efficiency. The average coverage depth was 1954-fold. Higher coverage depth can  
126 be achieved by capturing images for more fields of view.

#### 127 *Sequencing accuracy*

128 The accuracy was calculated by comparing the reference sequences with the consensus  
129 sequences. Consensus sequences were calculated as the most frequent bases at each position in  
130 the sequence alignment (Table 2). By comparing the consensus sequence to the reference  
131 sequence base-by-base, the consensus sequence is 100% identical to the reference sequence in  
132 our four repeated experiments. We performed sampling-subsampling to the sequence data to get  
133 low-coverage data, and recalculated the consensus sequences at different coverage depth. If each  
134 base was covered only one time, which means the coverage depth is 1 fold, the accuracy was 95%  
135 on average. If each base was covered with 5 times or more on average, the consensus accuracy is  
136 approaching 100% accuracy (Fig. 4c). We performed multiple repeated experiments to estimate  
137 the errors in the raw sequencing data. The reads from each template were separately aligned to  
138 the DNA reference. Each position in the reference was mapped by multiple reads. The error rate  
139 of a position was the ratio of reads disagreeing with the reference divided by the total number of  
140 reads mapped to the reference. The overall error rate was an average of error rate of all positions.  
141 The error of raw sequencing reads was dominated by deletion (Fig. 4b). The substitution error is  
142 relatively small, in four repeated experiment, the average substitution rate is 0.52% per base (Fig.  
143 S6).

#### 144 *Detecting low frequency of mutations*

145 The wild type DNA was mixed with mutant type DNA at 10:1 and 97:3 ratios (Table 1). The  
146 DNA mixture was hybridized to the flow cell and sequenced. Each raw sequence read was  
147 aligned to reference sequences to determine whether it originated from wild type or mutant type  
148 DNA. As a control, we also sequenced pure wild type DNA with the same condition. We found  
149 that the percentage of mutant DNA detected in the DNA mixture was significantly higher than  
150 that in pure wild type DNA control (Fig. 5). In this experiment, SMTS can detect mutant  
151 sequences with frequency 3%.

## 152 Discussion

153 We here demonstrated a method of capturing and sequencing DNA in a single step, which  
154 provides a much simpler approach to targeted sequencing. We have shown that the mutations  
155 and short deletions can be accurately detected at low frequency.

156 We have included several mutations of EGFR/KRAS/BRAF genes in this study. These mutations  
157 are actionable and can be therapeutically target. Somatic mutations in EGFR in exon 18, 19, 21  
158 and the T790M point mutation in exon 20 are predictive of a clinical response to the EGFR  
159 tyrosine kinase inhibitor drugs gefitinib and erlotinib<sup>9, 10</sup>. Somatic mutations in KRAS (codons  
160 12, 13) and BRAF (V600E) in colorectal cancer that predict poor prognosis and nonresponse to  
161 anti-EGFR antibodies. BRAF V600E is predictive of a positive response to the BRAF V600-  
162 specific inhibitor vemurafenib in melanoma<sup>11</sup>.

163 SMTS has several advantages over the more traditional Sanger sequencing and other NGS  
164 platforms commonly used for the detection of mutations. Firstly, there is little required in the  
165 way of sample preparation. Only sonication of the genomic DNA is needed. In the case of  
166 nucleic acids from sources such as FFPE or cfDNA, it is possible that even the sonication is not  
167 needed. Other high throughput sequencing technology such as Illumina requires days of labor  
168 work on sample preparation, which contains multiple steps such as sonication, end repairing, dA  
169 tailing, adaptor ligation, PCR amplification and target enrichment. Therefore, the SMTS  
170 technology has the potential of reducing cost, turn-around time and the risk of errors in sample  
171 handling. Secondly, SMTS technology directly sequences original individual molecules, not  
172 PCR products. This should provide increased sensitivity for the detection of low prevalence  
173 mutations and avoid PCR biases<sup>12</sup>, which are essential features in the sequencing of a  
174 heterogeneous cancer sample<sup>13</sup>.

175 We observed that the coverage depth was not uniform among different positions. Some  
176 sequences appeared to be difficult to be sequenced. The uniformity of coverage could be  
177 improved by carefully designing the capture probes, in particularly, to avoid the secondary  
178 structure. We also observed that only one third of fluorescence spots were from single molecules.  
179 Under the random attachment scenario described in this study, a large portion of spots came from  
180 two or more molecules binding closer than the diffraction limited resolution of the system. The  
181 ratio of single molecules could be increased by optimizing the hybridization condition and/or

182 controlling the density of capture probes. The overall error rate of raw sequences was still  
183 significant<sup>14</sup>. To reduce the error rate, we need to further optimize the chemical reaction  
184 conditions for incorporating reversible terminators and cleaving the fluorescence dye after  
185 imaging. Meanwhile, by modeling the error profiling, a better base calling algorithm could be  
186 developed. The four reversible terminators (A, T, C and G) used in current study were labeled  
187 with the same fluorescence dye. In future, we can modify the reversible terminators and label  
188 each of four nucleotides with unique fluorescence dyes<sup>15</sup>. By doing so, the speed and accuracy  
189 will be improved.

190 For the foreseeable future, the high cost and complexity of data analysis will limit the application  
191 of whole-genome sequencing for the detection of mutations in a clinical setting. Targeted  
192 resequencing of areas of interest will therefore remain key to determining mutational status.  
193 SMTS is a stride forward in putting this into practice. Although currently only a few loci of a  
194 few genes are screened, there is clearly scope for the creation of multi-gene capture arrays,  
195 allowing large numbers of loci to be analyzed rapidly and cost-effectively with low DNA input  
196 requirements. The single-step capturing and sequencing whole exome is also possible in future.  
197 In its simplicity, this approach provides an opportunity to truly begin integrating the vast  
198 quantity of genomic data generated in this next-generation era with clinical practice.

199

## 200 **Methods**

### 201 *Optical setup*

202 A custom-engineered sequencer prototype contained a Total Internal Reflection Fluorescence  
203 (TIRF) microscope with 60X oil objective (Nikon Ti-E, Japan), EMCCD camera with a  
204 resolution of 512X512 (Andor, Belfast, UK) and 2 color laser powers, 532nm (100mW) and  
205 640nm (100mW). A motorized stage (ASI, Eugene, OR) was installed on the TIRF microscope  
206 to hold and control the motion of the flow cell (Bioprotechs, Bulter, PA) during sequencing. The  
207 heater (Bioprotechs, Bulter, PA) for both flow cell and objective was installed and can maintain the  
208 temperature in chamber of the flow cell at 37 °C.

### 209 *Flow cell and liquid handing*

210 The FCS2 flow cell contained the chemical functionalized coverslip with epoxy layer (Schott,  
211 Jena, Germany), 0.175mm thick and 40mm in diameter. A gasket was assembled between the  
212 coverslip and an aqueduct slide which forms the chamber (3mm X 23 mm X 0.25 mm) for  
213 chemical reaction. The sandwiched structure part was fixed by a top with stainless steel tube  
214 inside (inlet port and outlet port) and metal base. A Titan EZ valve with 12 channels (IDEX  
215 Health & Science, Oak Harbor, WA, USA) was connected between the inlet of the flow cell and



216 sequencing reagents. The outlet of the flow cell was connected with a syringe pump (Tecan,  
217 Männedorf, Swiss) to drive the fluidic in the system by suction.

### 218 *Surface chemistry*

219 Synthesized capture probes (oligonucleotides) were covalently coupled to the epoxy coated  
220 coverslip surface. The capture probes were firstly incubated at 95 °C, then the coverslip was  
221 immersed into a capture probe solution at 1 nM in 150mM K<sub>2</sub>HPO<sub>4</sub>, pH 8.5 at 37 °C for 2 hours.  
222 Then the coverslip was rinsed by 3X SSC with 0.1% Triton X-100 and 3X SSC, 150mM  
223 K<sub>2</sub>HPO<sub>4</sub>, pH 8.5 in sequence.

### 224 *Imaging processing*

225 Images are processed using a custom written spot localization algorithm (Fig. S4). Firstly, stage  
226 drifts between different imaging cycles were corrected by calculating the peak position of two  
227 images by Phase-Only Correlation (POC) function. After correcting all cycles with the  
228 corresponding first cycle, the corrected images were convolved with a Gaussian kernel. The  
229 correlation images were then subjected to the threshold determined by the noise measurement on  
230 those images. All contiguous groups of pixels above the threshold were grouped as spots. After  
231 that, each spot was fitted with a Gaussian function. This step allowed an accurate determination  
232 of the centroid position for single molecules and both members of closely standing molecule  
233 pairs. At the same time, clusters of three or more molecules were filtered out. A spot that  
234 appeared twice at a same time point but under different wavelength lasers was considered as a  
235 base incorporation event. Thus, the spot was renamed as an incorporation spot and marked on the  
236 incorporation image. A set of incorporation spot centroids falling within a 1.6 pixel radius is  
237 called a “track”. Comparing with the order of adding reversible terminators, these “tracks” were  
238 converted to the final sequences on the position of each incorporation spot.

### 239 *Target template of EGFR/KRAS/BRAF*

240 Eight mutation sites in three genes (EGFR, KRAS and BRAF) were covered by the target  
241 templates, including six point mutations (G719A in EGFR exon 18, T790M in EGFR exon 20,  
242 L858R and L861Q in EGFR exon 21, G12S and G13D in KRAS exon 2 and V600E in BRAF  
243 exon 15) and two short deletions (ΔE746-A750 deletions and ΔE747-A753 deletions in  
244 EGFR exon 19). We designed two target sequences for each genetic variant, which are wild  
245 type and mutant type. The length of each target template was 70 bp, with a Cy3 fluorescence dye  
246 attached to the 3' end. Synthetic target templates were hybridized with capture probes attached  
247 on the surface of flow cell according to complementary matching principle.

### 248 *Capture probe design*

249 A 60nt capture probe sequence with 10 dT bases and an amine labeled 5' end was designed  
250 according to the upstream gene sequence of mutation sites. The 50nt target-specific sequence at

251 the 3' end of capture probe sequence were designed according to the program BatchPrimer3, with  
252 specified conditions: 20%-80% GC and Tm's >65°C. Capture probes and target templates were  
253 synthesized by Sangon Biotech(Shanghai).

#### 254 *Reversible terminators*

255 The modified reversible terminators are composed of nucleotide triphosphates, modified with a  
256 detectable label (Atto647N) by disulfide linker and an inhibitor group(SeqLL, Woburn, MA,  
257 USA). The inhibitor region has multiple negative charged groups (carboxyl group) allowing  
258 incorporation of one nucleotide into the DNA duplex while prohibiting the second or third or  
259 more nucleotide incorporation. The detectable label and inhibitor group were cleavable.

#### 260 *Sequencing cycle*

261 The coverslip was incubated in synthesized templates labeled with Cy3 solution at 5nM in 3X  
262 SSC, pH7, at 55 °C for 2 hours to form a DNA duplex. Then the surface was rinsed with 150mM  
263 HEPES, 1X SSC and 0.1% SDS, followed by 150mM HEPES and 150mM NaCl. Finally the  
264 coverslip was assembled into the follow cell.

265 The sequencing process was controlled automatically by the fluidic system. Two different types  
266 of reagents containing nine pre-prepared reagents were used and stored at different temperatures.  
267 One type is the chemical or biochemical reaction reagents, including four nucleotide (dNTP-  
268 Atto647N) and DNA polymerase mixtures, cleavage reagent (TCEP, 50mM), cap reagent  
269 (50mM idoacetamide), and imaging buffer (50mM Trolox, 20mM glucose and 5mM glucose  
270 oxidase in HEPES buffer) stored at 4 °C. The other is rinse buffer including rinse buffer 1  
271 (150mM HEPES, 1X SSC and 0.1% SDS, pH 7.0) and rinse buffer 2 (150mM HEPES and  
272 150mM NaCl, pH 7.0) stored at room temperature.

273 First, 0.25 μM reversible terminators (one of G, C, T and A) and 20nM polymerase mixture was  
274 introduced into the flow cell, incubated for 4 minutes at 37 °C and washed out by rinse buffer1  
275 and 2. Then imaging buffer (50mM Trolox, 20mM glucose and 5mM glucose oxidase in HEPES  
276 buffer) was pumped in the flow cell. Then, the images of 300FOVs were taken. Typically, 4  
277 exposures of 0.1 second were taken in each field of view (FOV, 54.6μm ×54.6μm). After  
278 imaging, the flow cell was washed by rinse buffer. The cleave reagent was introduced into the  
279 flow cell and reacted for 5 minutes flowed by the cap reagent under reaction for another 5  
280 minutes. Finally the flow cell was washed by rinse buffer and finished the first cycle of  
281 sequencing. The sequencing cycle was repeated with the same procedure, except changing the  
282 reversible terminators. In this paper, the terminators were added into the system as the repeated  
283 order of G, C, T, A.

#### 284 *Bioinformatics*



285 Quality control on the sequence reads was first performed. Firstly, reads with length less than 5  
286 bases were filtered out. Then, sequencing reads that appeared less than 4 times were filtered out.  
287 Secondly, sequencing reads that could not be aligned to reference sequences are not included for  
288 further analysis.

289 The alignment described above was performed with Smith-Waterman algorithm, which performs  
290 local sequence alignment. By using a custom definition scoring system (which included the  
291 substitution matrix and the gap-scoring scheme), the chosen algorithm could guarantee  
292 identification find of the optimal local alignment. In this setup, the penalty for a deletion in a  
293 read was -1, for an insertion -1, for a match 2, and for a substitution -2.

## 294 References

- 295 1. Metzker, M.L. Sequencing technologies - the next generation. *Nature reviews. Genetics* **11**, 31-  
296 46 (2010).
- 297 2. Dewey, F.E., Pan, S., Wheeler, M.T., Quake, S.R. & Ashley, E.A. DNA sequencing: clinical  
298 applications of new DNA sequencing technologies. *Circulation* **125**, 931-944 (2012).
- 299 3. Rehm, H.L. Disease-targeted sequencing: a cornerstone in the clinic. *Nature reviews. Genetics* **14**,  
300 295-300 (2013).
- 301 4. Clark, M.J. et al. Performance comparison of exome DNA sequencing technologies. *Nat Biotech*  
302 **29**, 908-914 (2011).
- 303 5. Mamanova, L. et al. Target-enrichment strategies for next-generation sequencing. *Nat Meth* **7**,  
304 111-118 (2010).
- 305 6. Braslavsky, I., Hebert, B., Kartalov, E. & Quake, S.R. Sequence information can be obtained from  
306 single DNA molecules. *Proceedings of the National Academy of Sciences of the United States of*  
307 *America* **100**, 3960-3964 (2003).
- 308 7. Thompson, J.F. et al. Single-step capture and sequencing of natural DNA for detection of BRCA1  
309 mutations. *Genome research* **22**, 340-345 (2012).
- 310 8. Xie, X.S. & Trautman, J.K. Optical studies of single molecules at room temperature. *Annual*  
311 *Review of Physical Chemistry* **49**, 441-480 (1998).
- 312 9. Sakai, K. et al. Detection of epidermal growth factor receptor T790M mutation in plasma DNA  
313 from patients refractory to epidermal growth factor receptor tyrosine kinase inhibitor. *Cancer*  
314 *Science* **104**, 1198-1204 (2013).
- 315 10. Paez, J.G. et al. EGFR Mutations in Lung Cancer: Correlation with Clinical Response to Gefitinib  
316 Therapy. *Science* **304**, 1497-1500 (2004).
- 317 11. Davies, H. et al. Mutations of the BRAF gene in human cancer. *Nature* **417**, 949-954 (2002).
- 318 12. Aird, D. et al. Analyzing and minimizing PCR amplification bias in Illumina sequencing libraries.  
319 *Genome Biology* **12**, R18 (2011).
- 320 13. Milos, P.M. Emergence of single-molecule sequencing and potential for molecular diagnostic  
321 applications. *Expert review of molecular diagnostics* **9**, 659-666 (2009).
- 322 14. Harris, T.D. et al. Single-molecule DNA sequencing of a viral genome. *Science* **320**, 106-109  
323 (2008).
- 324 15. Chen, F. et al. The History and Advances of Reversible Terminators Used in New Generations of  
325 Sequencing Technology. *Genomics, Proteomics & Bioinformatics* **11**, 34-40 (2013).

326

327 **Acknowledgement**

328 This work was financially supported by the Shenzhen Science and Technology Innovation  
329 Commission (#Pu20150387 and #CYZZ2014110845956), and in part by Human resources and  
330 social security bureau of Shenzhen City (#2015069). We thank Dr. J. William Efcavitch and Dr.  
331 Yilin Wang for helping on designing and performing experiments. We also thank Azco and  
332 SeqLL for providing help on reagents.

333 **Figures**

334 **a**

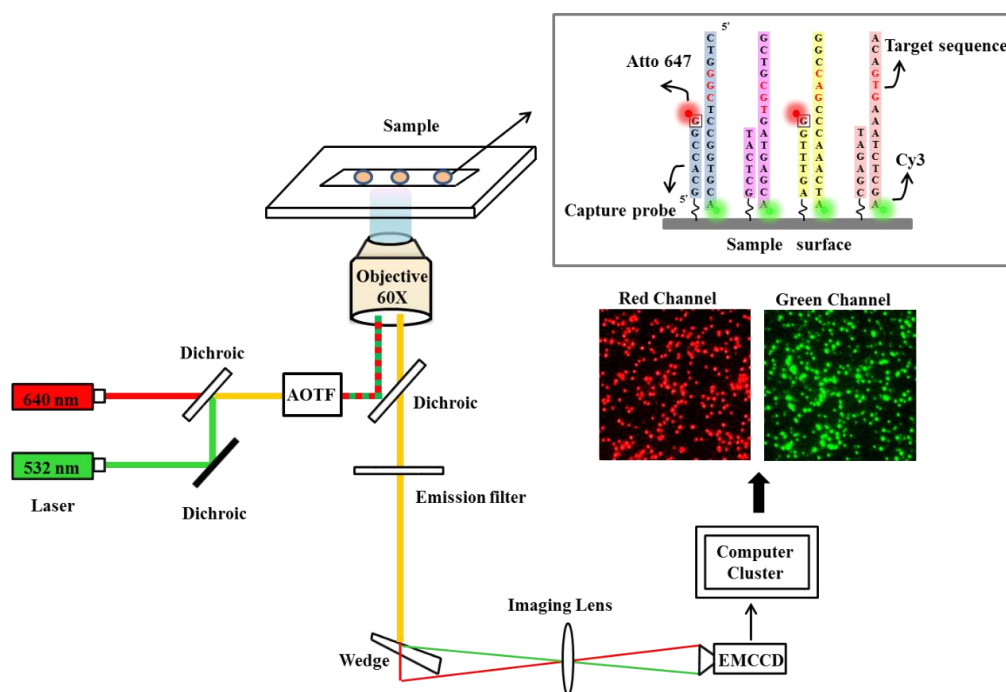

335

336 **b**

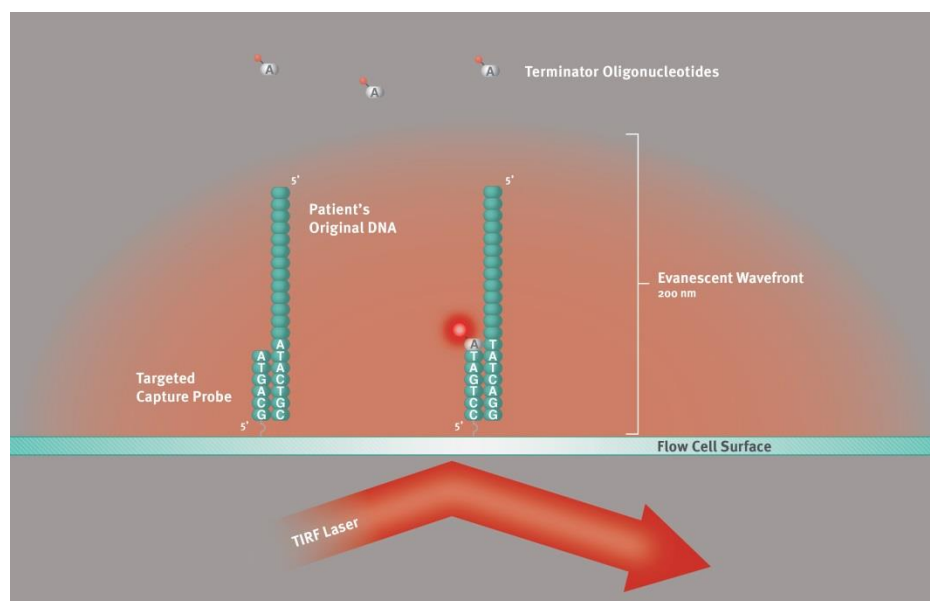

337

338 **Figure 1. Schematic drawing of single molecule sequencing platform.** (a) Schematic drawing of the  
339 optical setup. The green laser illuminates the Cy3 dyes which are attached to 3' end of the target DNA  
340 template. The Cy3 dyes are non-cleavable. The red laser illuminates the cleavable Atto647N dyes which

341 are attached to reversible terminators. Both Cy3 and Atto647N fluorescence spectra are recorded  
342 independently by an EMCCD. (b) Schematic of primed DNA templates attached to epoxy coated  
343 coverslip surface. The capture probes are covalently attached to the coverslip surface, and the target DNA  
344 templates are hybridized to the capture probes. The evanescent wave of TIRF illuminated the area within  
345 200nm above the flow cell surfaces. The DNAs attached to the surfaces are within the range of  
346 evanescent wave.

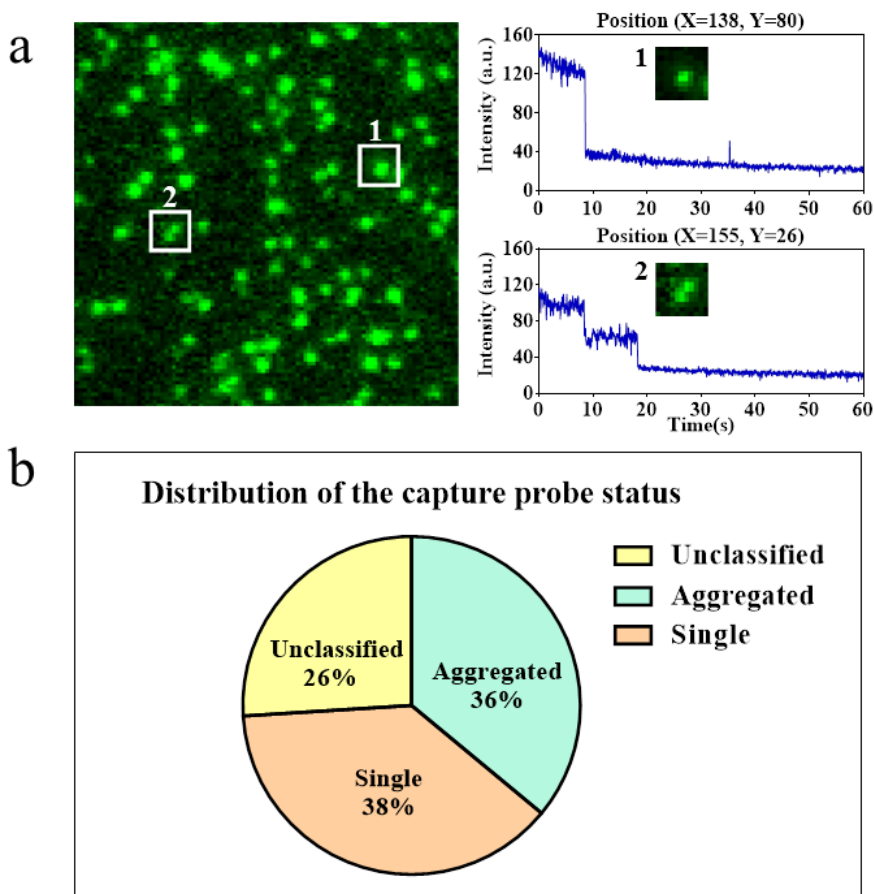

347  
348 **Figure 2. Quantifying the ratio of single molecules of capture probes.** (a), the photobleaching of  
349 single molecules are in a single step. Here, single spot was traced and its intensity was recorded. A single-  
350 step photobleaching indicated that this spot was composed only one Cy3 molecule, i.e the spot #1. Spot  
351 #2 was composed of two molecules binding together and therefore displaying two steps of  
352 photobleaching. (b), The composition of single molecules, aggregated molecules and unclassified cases in  
353 one field of view.

354

355

356

357

**a**

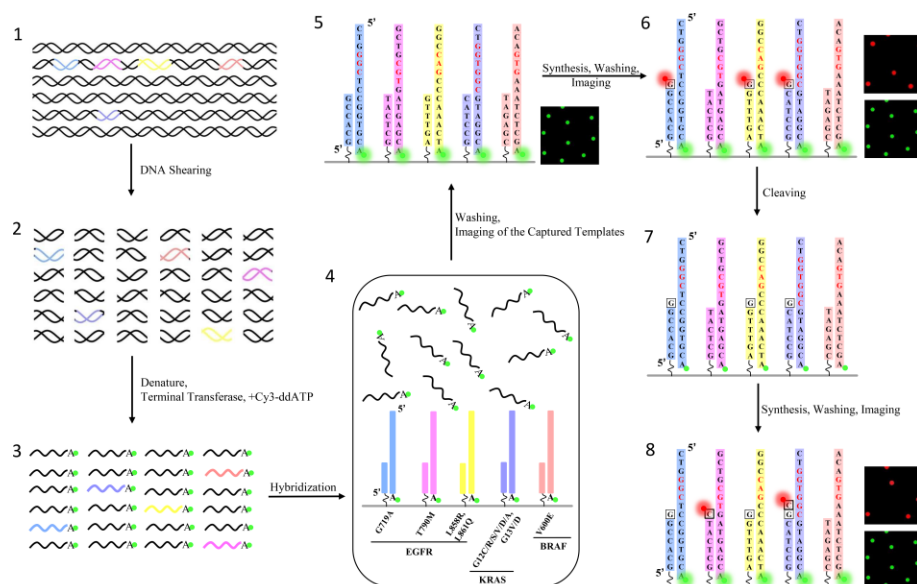

358

359

**b**

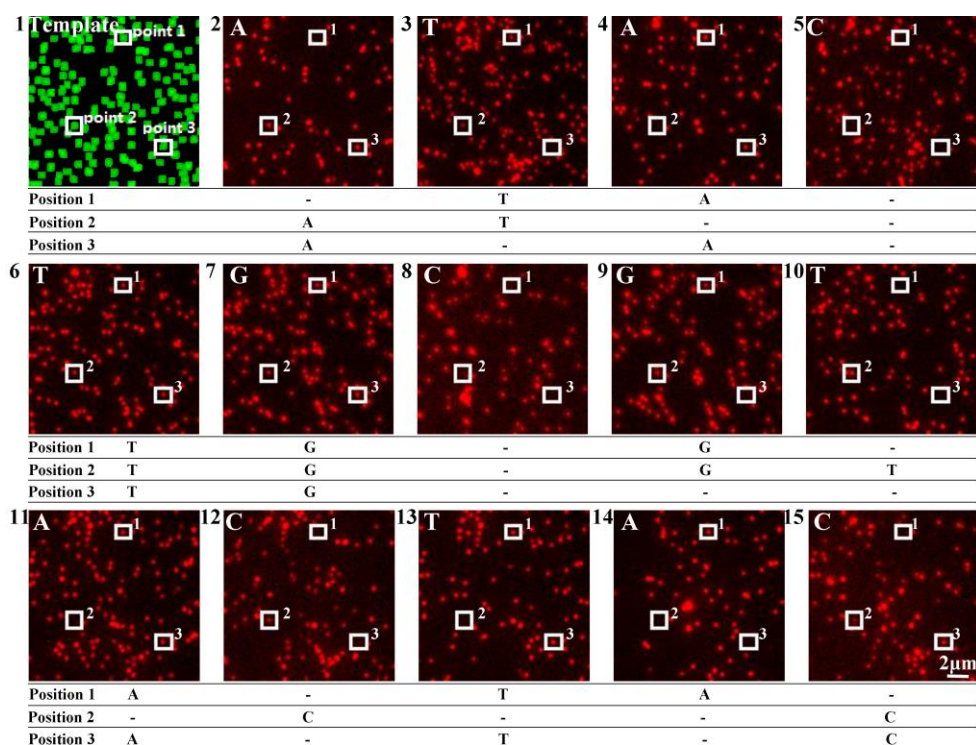

| Base#  | 1 | 2 | 3 | 4 | 5 | 6 | 7 | 8 | 9 | 10 | 11 | 12 | 13 | 14 | 15 |
|--------|---|---|---|---|---|---|---|---|---|----|----|----|----|----|----|
| Oligo# |   |   |   |   |   |   |   |   |   |    |    |    |    |    |    |
| 1      | T | A | T | G | G | A | T | A | C | C  | C  | T  | C  | A  | C  |
| 2      | A | T | T | G | G | T | C | C | T | G  | T  | T  | T  | A  | A  |
| 3      | A | A | T | G | A | T | C | A | C | G  | G  | T  | A  | A  | A  |

360

361 **Figure 3. (a)**, The sequencing procedure. DNA template with Cy3 attached at 3' end was hybridized to  
 362 the flow cell anchored with capture probes (step 1-4). The capture probes are designed complementary to  
 363 the genes of interest. Unhybridized DNA templates were washed away. The green laser excited the Cy3  
 364 fluorescence dye to locate the position of target DNA templates. (step 5). One of four types of reversible  
 365 terminators labeled with red fluorescence and polymerases mixture were added to the flow cell. The DNA  
 366 molecule extended a base if the reversible terminator matched complementary to the next base in the  
 367 DNA molecule. Unincorporated reversible terminator was washed out. The red laser excited the Atto647  
 368 fluorescence dyes of reversible terminators (step 6). The fluorescence dyes in the reversible terminators  
 369 were cleaved and wash away (step 7). A new cycle of sequencing began (step 8). (b), Multiple sequencing  
 370 cycles, imaging and base calling. We traced a part of one field of view in multiple sequencing cycles. In  
 371 the beginning, the image of Cy3 green fluorescence dyes were used to locate the position of target  
 372 templates. Three positions were circled out and were traced. In the first cycle, reversible terminators A  
 373 (nucleotide analogs) were flowed in for reaction. Position 2 and 3 successfully incorporated a base. In the  
 374 second cycle, the reversible terminators T were flowed in for reaction. Position 1 and 2 successfully  
 375 incorporated a base. The sequencing continued and the sequence of DNA template extended. The  
 376 sequence of each DNA template in position 1, 2 and 3 can be reconstructed.

| Oligo Name | Probe Sequence (5'-3')                                      | Gene |
|------------|-------------------------------------------------------------|------|
| EKB-1P     | TTTTTTTTTTCAGAGGCTGTGCCAGGGACCTTACCTTATACACCGTGCCGAACGCACCG | EGFR |
| EKB-2P     | TTTTTTTTTAGCAAAGCAGAACTCACATCGAGGATTCCTTGTGGCTTCGGAGATG     | EGFR |
| EKB-3P     | TTTTTTTTTCTGGATCCAGAAAGGTGAGAAAGTTAAAATCCCGTCGCTATCAAGGAAT  | EGFR |
| EKB-4P     | TTTTTTTTTTCACGTGTCCCGCTGCTGGGCATCTGCCTCACCTCCACCGTGCAGCTCAT | EGFR |
| EKB-5P     | TTTTTTTTTTCAGGAACGTAAGTGGTAAAAACACCGCAGATGTCAGATCAGAGATTTTG | EGFR |
| EKB-6P     | TTTTTTTTTTCCTTACTTTGCCTCCTCTGCATGGTATTCTTCTCTCCGCACCCAG     | EGFR |
| EKB-7P     | TTTTTTTTTTCACAAAAATGATTCTGAATTAGCTGTATCGTCAAGGCACTCTTGCCTAC | KRAS |
| EKB-8P     | TTTTTTTTTAAATGGATCCAGACAACCTGTTCAAAGTATGGGACCCACTCCATCGAGAT | BRAF |

| Oligo Name | Wild Sequence (5'-3')                                                           | Gene |
|------------|---------------------------------------------------------------------------------|------|
| EKB-1T-n   | AATTCAAAAAGATCAAAGTGCTGGCTCCGGTGCCTGCGCACGGTGTATAAGGTAAGGTCCCTGGCACAGGCCTCTG    | EGFR |
| EKB-2T-n   | GTCGCTATCAGGAATTAAGAGAAGCAACATCCGAAAGCCAACAAGGAAATCCTCGATGTGAGTTTCTGCTTTGCT     | EGFR |
| EKB-3T-n   | TGGCTTTCGGAGATGTTGCTTCTTAATTCCTTGATAGCGACGGGAATTTAACTTCTCACCTTCTGGGATCCAG       | EGFR |
| EKB-4T-n   | GAGGCAGCCGAAGGGCATGAGCTGCTGATGAGCTGCACGGTGGAGGTGAGGCAGATGCCAGCAGGGCCACACGTG     | EGFR |
| EKB-5T-n   | TCTTCCGCACCCAGCAGTTTGGCCAGCCAAAATCTGTGATCTTGACATGTGCGGTGTTTACCAGTACGTTCTCTG     | EGFR |
| EKB-6T-n   | GATCACAGATTTTGGGCTGGCCAAACCTGCTGGGTGCGGAAGAGAAAGAATACCATGCAGAAGGAGGCAAAGTAAGGAG | EGFR |
| EKB-7T-n   | TAAACTGTGGTAGTTGGAGCTGGTGGCGTAGGCAAGAGTGCCTTGACGATACAGCTAATTCAGAATCATTGTGGA     | KRAS |
| EKB-8T-n   | TAGGTGATTTGGTCTAGCTACAGTAAATCTCGATGGAGTGGTCCCATCAGTTTGAACAGTTGTCTGGATCCATT      | BRAF |

| Oligo Name | Mutation Sequence (5'-3')                                                     | Gene | Amino Acid Variant |
|------------|-------------------------------------------------------------------------------|------|--------------------|
| EKB-1T-m   | AATTCAAAAAGATCAAAGTGCTGGCTCCGGTGCCTGCGCACGGTGTATAAGGTAAGGTCCCTGGCACAGGCCTCTG  | EGFR | G719A              |
| EKB-2T-m   | AAAAGTAAAATCCCGTGCCTATCAGACATCCGAAAGCCAACAAGGAAATCCTCGATGTGAGTTTCTGCTTTGCT    | EGFR | ΔE746-A750del      |
| EKB-3T-m   | ACATCGAGGATTTCTTGTGGCTTCAATCTCTTGATAGCGACGGGAATTTAACTTCTCACCTTCTGGGATCCAG     | EGFR | ΔE747-A753del      |
| EKB-4T-m   | GAGGCAGCCGAAGGGCATGAGCTGATGATGAGCTGCACGGTGGAGGTGAGGCAGATGCCAGCAGGGCCACACGTG   | EGFR | T790M              |
| EKB-5T-m   | TCTTCCGCACCCAGCTTTGGCCCGCCAAAATCTGTGATCTTGACATGTGCGGTGTTTACCAGTACGTTCTCTG     | EGFR | L858R              |
| EKB-6T-m   | GATCACAGATTTTGGGCGGCCAAACAGCTGGGTGCGGAAGAGAAAGAATACCATGCAGAAGGAGGCAAAGTAAGGAG | EGFR | L861Q              |
| EKB-7T-m   | TAAACTGTGGTAGTTGGAGCTTCTGAGCTAGGCAAGAGTGCCTTGACGATACAGCTAATTCAGAATCATTGTGGA   | KRAS | G12S, G13D         |
| EKB-8T-m   | TAGGTGATTTGGTCTAGCTACAGAGAAATCTCGATGGAGTGGTCCCATCAGTTTGAACAGTTGTCTGGATCCATT   | BRAF | V600E              |

377  
 378 **Table 1. The capture probe and target DNA sequence information.** The top block is the capture probe  
 379 sequences we synthesized. The capture probes were designed to capture EGFR/KRAS/BRAF genes. The  
 380 middle block is the target DNA sequence designed for testing. These sequences are design based on the  
 381 wild type of EGFR/KRAS/BRAF genes. Nucleotide bases in red color are drug related mutation sites.  
 382 The bottom block is the target DNA sequence designed based on the mutant type.



383

| Reference          | EGFR        |         |         |            |            |          | KRAS       | BRAF    |
|--------------------|-------------|---------|---------|------------|------------|----------|------------|---------|
|                    | CTCGGGTCGT  | AACGAAG | ATTCTCT | GTGCGTCG   | CCGACCGGTT | GTCAAAC  | CGGTGGTCG  | AAGTGAC |
| Alignment          | CTCGGGTCGT  | AACGAAG | ATTCTC  | GT_CGTCG   | CCGACCGGTT | GTCAA    | C_GTGGT    | AAGTGAC |
|                    | CTCGGGTCGT  | AACGAAG | ATTCTCT | GTaCGTCG   | CCGACCGGTT | GTCAAAC  | CGGTGGTCG  | AAGTGAC |
|                    | CTCGGGTCGT  | AACGAAG | ATTCTC  | GT_CGTCG   | CCGACCGGTT | GT_AA    | CGGTGGTCG  | AAGTGAC |
|                    | CTCGGGTCG   | AACGAAG | ATaCTC  | GT_CGTCG   | CCGACCGGTT | GTCAA    | CGGTGGTCG  | AAGTGAC |
|                    | CTCGGGTCGT  | AACGAAG | ATaCTC  | GTaCGTCG   | CCGACCGGTT | GTCA     | CGGTGGTCG  | AAGTGAC |
|                    | CTCGGGTCGT  | AACGAAG | A_TCTC  | GTaCGTCG   | CCGACCGGTT | GTCA     | CGGTGGTCG  | AAGTGAC |
|                    | CTCGGGTCGT  | AACGAaG | A_TCTCT | GT_CGTCG   | CCGACCGGTT | GTCA     | CGGTGGTCG  | AAGTGA  |
|                    | CTCGGGTCGT  | AACG_AG | A_TCTCT | GT_CGTCG   | CCGACCGGTT | GTCAA    | CGGTGGTCG  | AAGTGA  |
|                    | CTCGGGTCGT  | AACG_AG | ATTCTC  | GTGCGTCG   | CCGACCGGTT | GTCA     | CGGTGGTC   | AAGTGA  |
|                    | CTCGGGTCGT  | AA_GAAG | ATTCTC  | GTGCGTCG   | CCGACCGGTT | G_CAAAC  | CGGT       | AAGTGA  |
|                    | CTCGGGTCGT  | AACGAA  | ATTCTC  | GTGCGTCG   | CCGACCGGTT | GTCAAAC  | CGGTGGTC   | AAGTGA  |
|                    | CTCGGGTCGT  | AACGAA  | ATTCTC  | GTGCGT     | CCGACCGGTT | GTCAAAC  | C_GTGGTCG  | AAGTGA  |
|                    | CTCGGGTCGT  | AACGAA  | ATTCTC  | GT_CGTCG   | CCGACCGGTT | GTCA     | CGGTGGTC   | AAGTGAC |
|                    | CTCGGGTCGT  | AACGA   | ATTCTC  | GTGCGT     | CCGACCGGTT | GT_AA    | CGGTGGTC   | AAGTGAC |
|                    | CTCGGGTCGT  | AACGAAG | ATTCTC  | GTaCGTCG   | CCGACCGGTT | GT_AA    | CGGTGGTCG  | AAGTGAC |
|                    | CTCGGGTCGT  | AACGAAG | ATaCTC  | GT_CGTCG   | CCGACCGGTT | GTCA     | CGGTGGTCG  | AAGTGAC |
|                    | CTCGGGTCGT  | AACGAAG | ATaCTC  | GT_CGTCG   | CC_ACCGGTT | GTCA     | CGGTGGTCG  | AAGTGA  |
|                    | CTCGGGT     | AACGAAG | ATTCTC  | GT_CGTCG   | CCGACCGGTT | GTCA     | CGGTGGTCG  | AAGTGA  |
| CTCGGGTC           | AACG_AG     | A_TCTCT | GTGCGTC | CCGACCGGTT | GTCA       | CGGTGGTC | AAGTGA     |         |
| Consensus sequence | CTC GGGTCGT | AACGAAG | ATTCTCT | GTGCGTCG   | CCGACCGGTT | GTCAAAC  | C GGTGGTCG | AAGTGAC |

384

385 **Table 2. Sequencing alignment of raw reads.** The top row is the reference sequence. Insertion errors  
 386 were not shown in the alignment.

**a**

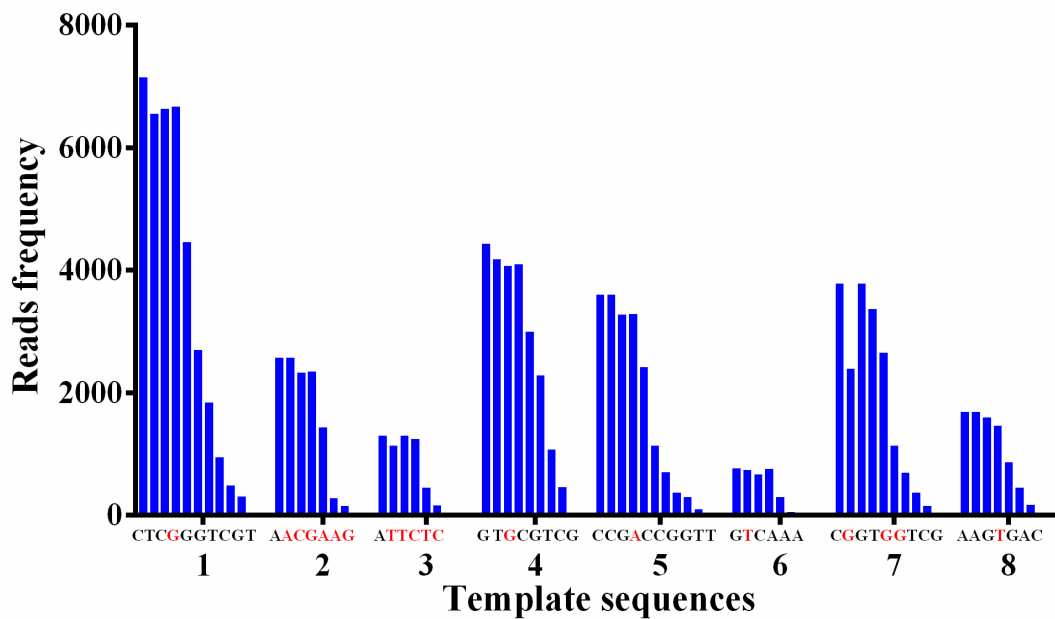

387

**b**

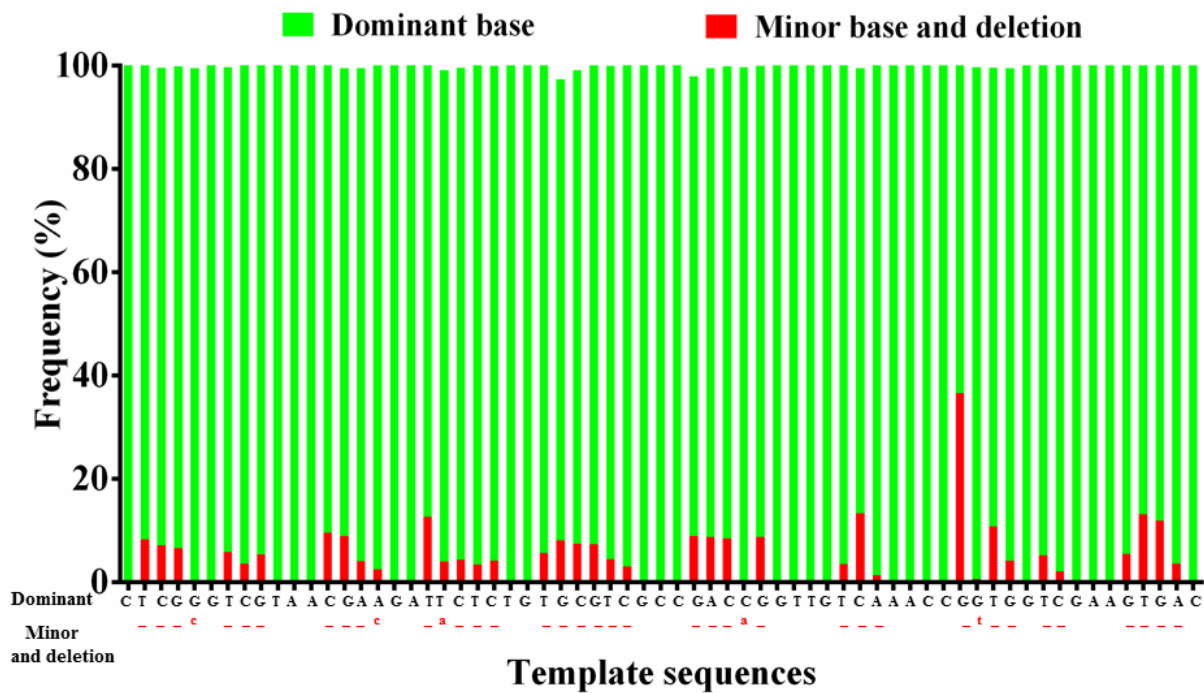

388

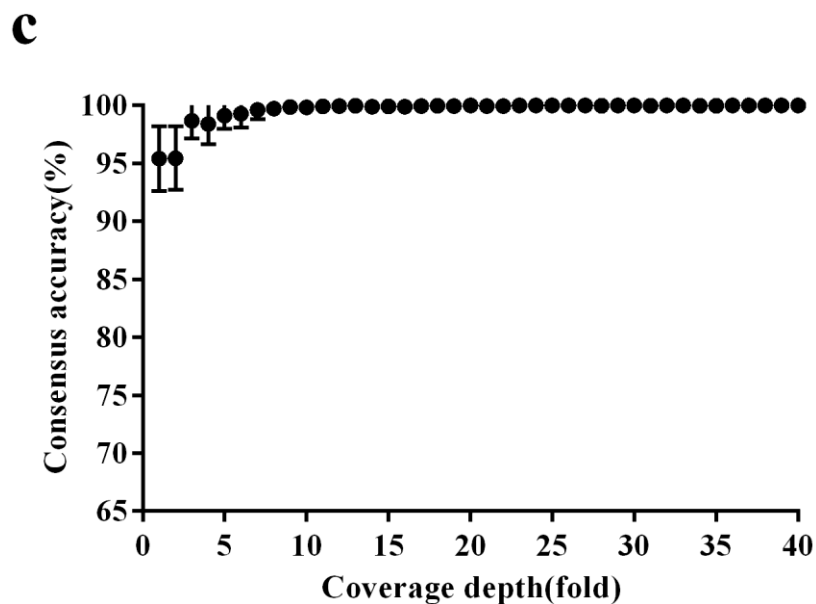

389

390 **Figure 4.** (a), the coverage per base. The frequently mutant position is in red color. Y-axis is the number  
391 reads mapped to each position. (b), The dominant and minor base at the each position. (c), The consensus  
392 accuracy increased with coverage depth. Sampling-subsampling was performed to simulate low coverage  
393 situation.

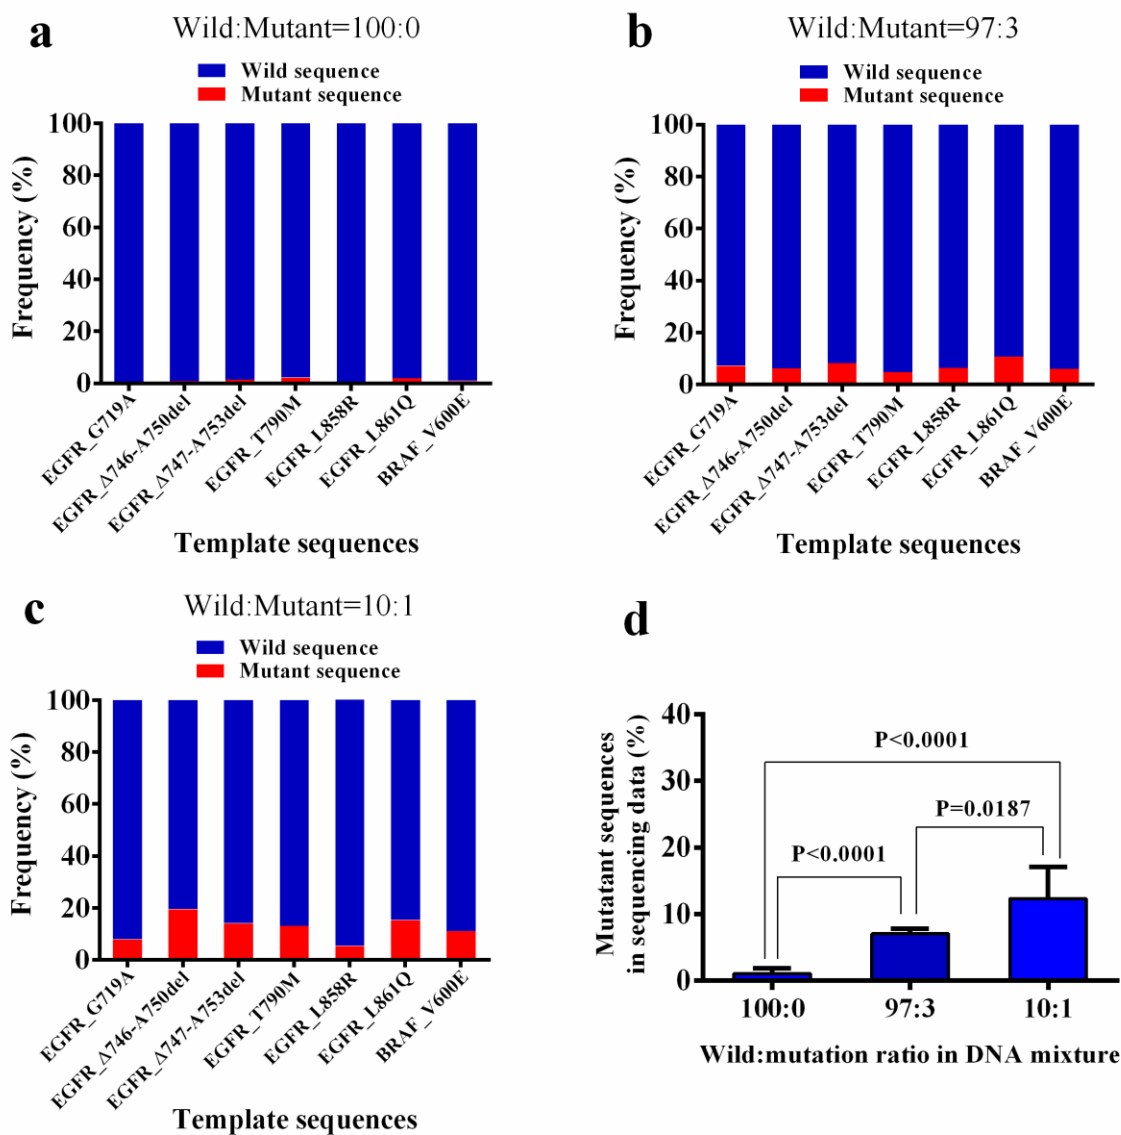

394

395 **Figure 5. Detecting mutant sequences in a mixture.** The wild type and mutant DNA were mixed at  
 396 100:0, 10:1 and 97:3 ratios. The mixed DNA was subjected to sequencing. Each sequence reads was  
 397 aligned to the wild type and mutant type reference sequences and alignment scores were calculated. If the  
 398 alignment score of wild type reference sequence was higher than that of mutant type reference sequence,  
 399 the original sequence read was classified as wild type. Otherwise, it was classified as mutant type. The  
 400 frequency of wild type and mutant type sequence reads are calculated for each reference. (a-c) The  
 401 frequency of wild type and mutant type sequences calculated from the sequencing data. (d), The average  
 402 of mutant sequences in sequencing data over all template sequences. P value is calculated by two-tailed  
 403 Student T test.

404
